# Supplementary material
Source: publisher figshare collection journal article supplement (https://karger.figshare.com/articles/dataset/_/4004856)
Supplement: Supplementary file 1 [file 1]

C9orf66, DOCK8, LOC105375946, LOC105375945, LOC105375944, KANK1, RPL12P25, FAM217AP1, LOC105375947, EIF1P1, LOC105375948, LOC105375949, DMRT1, LOC105375950, DMRT3, DMRT2, LINC01230, RPS27AP14, LOC102723803, RNA5SP279, LOC105375953, LOC105375952, LOC105375951, SMARCA2, LOC105375954, LOC105375955, LOC105375956, LOC101930053, LOC101930048, VLDLR-AS1, VLDLR, LOC105375957, KCNV2, PUM3, GPS2P1, ATP5HP2, CARM1P1, LINC01231, LOC105375959, LOC105375958, RFX3, LOC105375961, LOC105375960, RFX3-AS1, LOC105375962, LOC105375963, GLIS3, GLIS3-AS1, LOC105375964, LOC105375965, SLC1A1, LOC105375966, SPATA6L, RPS6P11, PLPP6, CDC37L1-AS1, CDC37L1, AK3, ECM1P1, RPS5P6, RCL1, KLF4P1, MIR101-2, HNRNPA1P41, JAK2, INSL6, CSNK1G2P1, PDSS1P1, MTND1P11, MTND4P14, MTND5P14, TCF3P1, IGHEP2, INSL4, RLN2, HMGN2P31, RLN1, PLGRKT, RNF152P1, CD274, PDCD1LG2, LOC105375967, RIC1, ERMP1, AK4P4, KIAA2026, MLANA, MIR4665, RANBP6, GTF3AP1, IL33, LOC645969, TPD52L3, UHRF2, GLDC, RPL23AP57, RNF2P1, RPL35AP20, LOC105375968, KDM4C, PRELID3BP11, SNRPEP2, ACTG1P14, LOC105375969, LOC105375970, LOC102723994, RPL4P5, PPIAP33, TMEM261, LOC105375971, PTPRD, RPL18AP11, PTPRD-AS1, RPS26P3, RN7SL5P, LOC105375972, PTPRD-AS2, LOC105375973, IMP3P1, AKAP8P1, LOC102724027, LOC105375974, LOC105375975, LOC101929446, LOC105375976, JKAMPP1, TYRP1, LURAP1L-AS1, LURAP1L, PRDX1P1, LOC100130801, MPDZ, LINC01235, LOC105375977, LOC101929507, LINC00583, PES1P2, RPL3P11, ATP5HP3, NFIB, RPL7AP47, TRH-GTG1-9, ZDHHC21, LOC105375978, CDCA4P1, CER1, FREM1, LOC105375979, LDHAP4, LOC105375980, LOC389705, CLCN3P1, PSIP1P1, LOC105375981, TTC39B, RPL7P33, SNAPC3, PSIP1, LOC105369291, FTH1P12, CCDC171, HMGN2P16, RNU6-14P, LOC100506331, C9orf92
