# Supplementary material
Source: publisher figshare collection journal article supplement (https://karger.figshare.com/articles/dataset/_/4004856)
Supplement: Supplementary file 2 [file 1]

DOCK8, KANK1, DMRT1, DMRT3, DMRT2, SMARCA2, VLDLR, KCNV2, PUM3, RFX3, GLIS3, SLC1A1, PLPP6, CDC37L1, AK3, RCL1, MIR101-2, JAK2, INSL6, INSL4, RLN2, RLN1, CD274, PDCD1LG2, RIC1, ERMP1, MLANA, IL33, UHRF2, GLDC, KDM4C, PTPRD, TYRP1, LURAP1L, MPDZ, NFIB, ZDHHC21, CER1, FREM1, TTC39B, SNAPC3, PSIP1
